# Supplementary material for: Novel Step-up DC-to-DC Converter with Isolated Transformer and Switched-Clamp Capacitor Techniques for Renewable Systems
Source: Preprints.org preprint supplement (doi:10.20944/preprints201610.0074.v1), 2016-10-18
Supplement: Supplementary file 1 [file supplementary]

**Cover letter for submission of a paper to an energies journal**

Wong Yong-Seng
National Cheng Kung University
National Synchrotron Radiation Research Center

No. 1 University Road, Tainan 701, Taiwan

[2016/08/19]

Dear Sir,

I wish to re-submit a manuscript entitled “Novel step-up DC-to-DC converter with isolated transformer and switched-clamp capacitor techniques for renewable systems” for consideration by the energies journal.

I am confirm that this work is original and have not been published elsewhere nor is it currently under consideration for publication elsewhere.

In this paper, I report on design a new isolated transformer DC-to-DC converter. This is significant because switched clamp capacitor technique. The paper should be of interest to readers in the areas of high step up dc-dc technology.

In this paper, a high step-up direct current–direct current converter integrating an isolated transformer and switched-clamp capacitor is presented in this study. To use the turn ratio and switched-clamp capacitor of an isolated transformer to achieve a high voltage gain and a passive clamp circuit to reduce voltage stress on the main power switch, the voltage stress of the main power switch should be clamped to 1/4 *V*o. The energy of the leakage inductor can be recycled by the clamp capacitor because of the passive clamp circuit, thereby improving the power converter efficiency. The converter is simply composed of one isolated transformer, one main switch, three capacitors and four diodes. The operating principle and steady-state analysis are also discussed. Finally, a 24 V input voltage to 200 V output voltages and 150 W output power prototype converter is achieved in the laboratory. The maximum efficiency of the converter is 95.1 at 60 W.

Thank you for your consideration of this manuscript.

Sincerely,

Yongseng Wong
